# Supplementary material for: A fast and stable Li metal anode incorporating an Mo6S8 artificial interphase with super Li-ion conductivity
Source: Royal Society of Chemistry journal article supplement (doi:10.1039/c8ta12450g), 2019-01-01
Supplement: c8ta12450g1.pdf [file c8ta12450g1.pdf]

## Supplemental Information

# **Fast and Stable Li Metal Anode Enabled by Mo<sub>6</sub>S<sub>8</sub> Artificial Interphase with Super Li-ion Conductivity**

Ke Lu <sup>a</sup>, Siyuan Gao <sup>a</sup>, Robert J. Dick <sup>b</sup>, Zain Sattar <sup>a</sup> and Yingwen Cheng <sup>a,\*</sup>

<sup>a</sup> Department of Chemistry and Biochemistry, Northern Illinois University, DeKalb, IL 60115  
United States

<sup>b</sup> Department of Science, Trine University, Angola, IN 46703 United States

\*E-mail: [ycheng@niu.edu](mailto:ycheng@niu.edu)

## Materials and methods

**Material Preparation of Cu<sub>2</sub>Mo<sub>6</sub>S<sub>8</sub>/C.** In a typical procedure for synthesizing Cu<sub>2</sub>Mo<sub>6</sub>S<sub>8</sub>/C, 1.2 g CuS, 1.8 g Mo, 3.0 g MoS<sub>2</sub> and 0.6 g graphite were added to a ball milling container inside a Ar-filled glove box. The container was transferred out of the glove box and was ball-milled with a high-energy mechanical milling (8000 M, SPEX SamplePrep, USA) for 6 hours. After this process, the powders were collected and transferred to a tube furnace. The tube furnace was heated to 1000 °C for 10 hours under the flow of 100 sccm Ar, and was then cooled to room temperature. The products were collected and analyzed, and were Cu<sub>2</sub>Mo<sub>6</sub>S<sub>8</sub>/C. The Cu<sub>2</sub>Mo<sub>6</sub>S<sub>8</sub> particles were synthesized using identical procedure without adding graphite.

**Preparation of Mo<sub>6</sub>S<sub>8</sub>/C:** Mo<sub>6</sub>S<sub>8</sub>/C particles were prepared from Cu<sub>2</sub>Mo<sub>6</sub>S<sub>8</sub>/C by acid leaching off Cu<sup>2+</sup>. In a typical procedure, 3.0 g of the as-synthesized Cu<sub>2</sub>Mo<sub>6</sub>S<sub>8</sub>/C powders were added to 50 ml 8.0 M HCl. The mixture was stirred at room temperature for 1 day and the powders were collected by centrifuge, washed repeatedly with water until pH neutral, and then dried under vacuum at 100°C.

## Materials characterizations

The crystallinity of the synthesized powders was examined by a Rigaku MiniFlex X-ray diffractometer. The particle size and morphology were analyzed using a Tecnai G2 twin TEM. The SEM images were collected using a Tescan Vega II microscope and the EDX spectra were collected using a INCAx-act Analytical EDS detector (Oxford Instruments).

## Electrochemical measurements

The Mo<sub>6</sub>S<sub>8</sub>/C artificial films for stabilizing Li metal were prepared by mixing Mo<sub>6</sub>S<sub>8</sub> particles (with or without carbon, as discussed in the manuscript), super-P carbon powder and polytetrafluoroethylene (PTFE) at a weight ratio of 90:5:5 and dried at 70 °C overnight under vacuum. Ni-rich NCM-811 (LiNi<sub>0.8</sub>Co<sub>0.1</sub>Mn<sub>0.1</sub>O<sub>2</sub>, supplied by Argonne National Laboratory) were used for constructing full-cell Li metal batteries. A piece of Mo<sub>6</sub>S<sub>8</sub>/C coated Li foil was used as the anode and the separator was Celgard membranes. 70 μl of 1.0 M LiPF<sub>6</sub> in EC/DMC (1:1 vol) was used as the electrolyte. The type 2025 coin cells were assembled inside an Ar-filled glove box (Mbraun LabStar). Cyclic voltammograms were measured using a CH Instruments electrochemical working station. Cycling and rate performance tests were conducted using constant current and constant voltage modes using Neware CT-4008 battery testers. All the prototype Li metal full batteries were tested between 2.7 and 4.3 V. When the voltage reached

4.3V, a constant voltage charge process at 4.3 V was applied until the charge current decreased to the value determined by  $C/10$  ( $1C = 1.5 \text{ mA/cm}^2$ ). Electrochemical impedance measurements were conducted at room temperature using a Gamry Reference 600 Potentiostat with a frequency range of 0.02 Hz to 100 kHz at the open circuit potential.

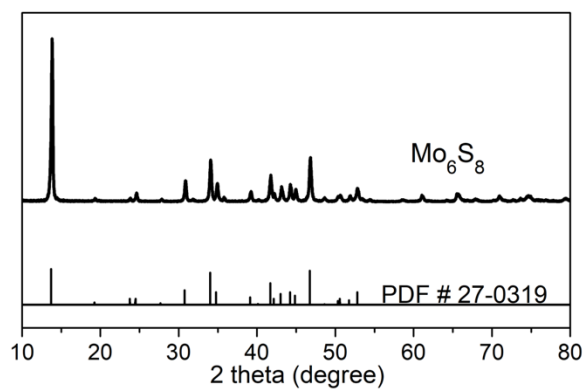

Figure S 1: XRD pattern of  $\text{Mo}_6\text{S}_8$  synthesized without adding carbon in the precursors.

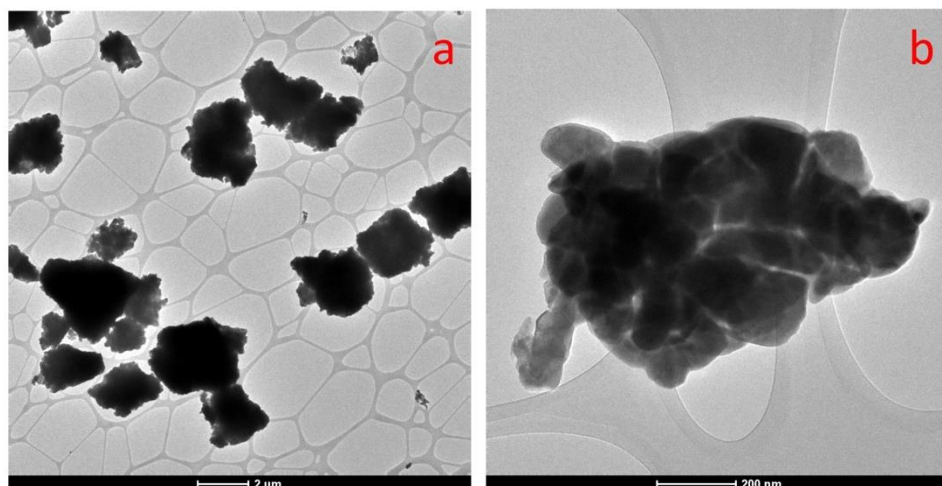

Figure S 2: TEM images of  $\text{Mo}_6\text{S}_8$  particles synthesized without addition of carbon. These particles have much bigger size compared with the particles synthesized with carbon.

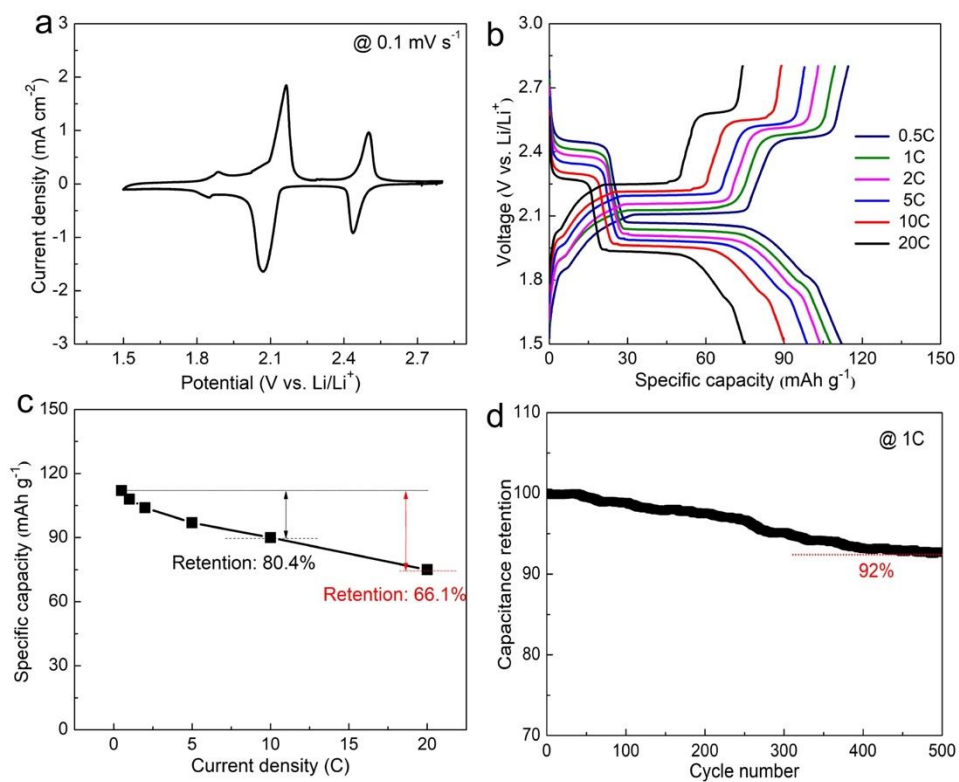

Figure S 3: Performance of Mo<sub>6</sub>S<sub>8</sub> particles for hosting Li-ions: a) cyclic voltammogram acquired at 0.1 mV/s; b-c) charge/discharge voltage profiles and specific capacities at different C-rates (1C = 122 mA/g); d) cyclic stability at 10 C for 500 cycles.

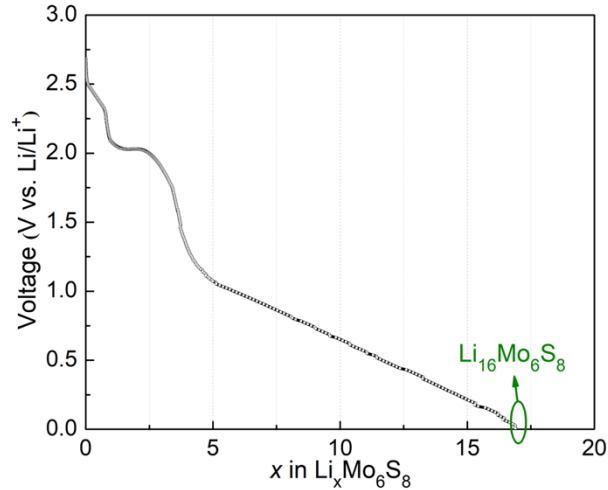

Figure S 4: Discharge voltage profile of the  $\text{Mo}_6\text{S}_8\|\text{Li}$  batteries to 0 V. The capacity was used to estimate the value of  $x$  in  $\text{Li}_x\text{Mo}_6\text{S}_8$ .

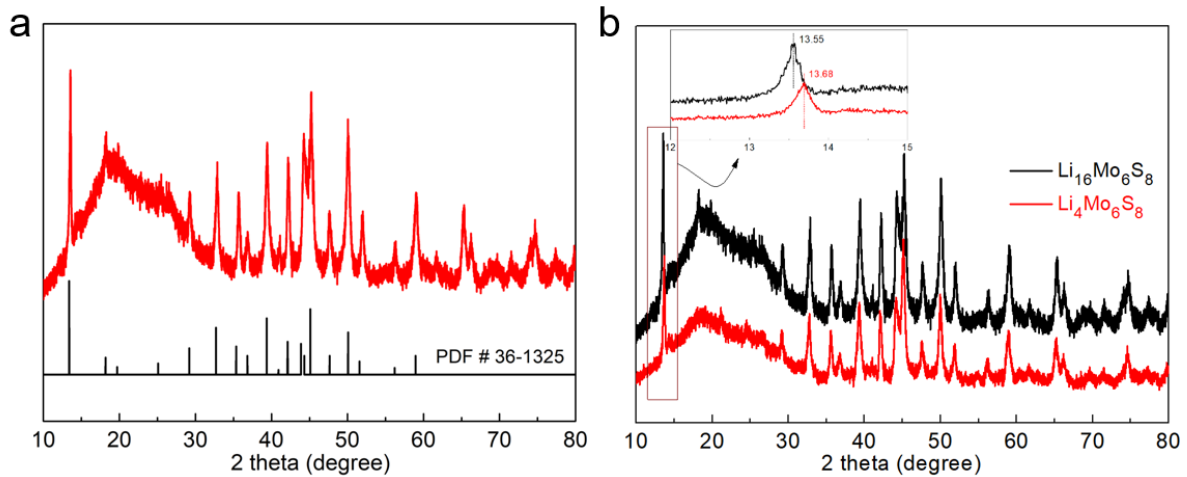

Figure S 5: (a) X-ray diffraction pattern of fully discharged  $\text{Mo}_6\text{S}_8$  (to 0V vs. Li,  $\text{Li}_{16}\text{Mo}_6\text{S}_8$ ). The overall profile of the peaks match with PDF#36-1325 (which is  $\text{Li}_{3.3}\text{Mo}_6\text{S}_8$ ) reasonably well, so we believe the overall structure of the Chevrel phase was pertained after complete lithiation. (b) XRD patterns of the  $\text{Mo}_6\text{S}_8$  electrode at the discharge depths of 1.5 V ( $\text{Li}_4\text{Mo}_6\text{S}_8$ ) and 0 V ( $\text{Li}_{16}\text{Mo}_6\text{S}_8$ ). The inset shows the enlarged region of the XRD patterns. During the lithiation processes, a high lattice stability was observed. Moreover, a gradual peak shift from about 13.68 for  $\text{Li}_4\text{Mo}_6\text{S}_8$  to approximately 13.55 for  $\text{Li}_{16}\text{Mo}_6\text{S}_8$  was observed, indicating that the interlayer space was slightly enlarged by the insertion of guest cations.

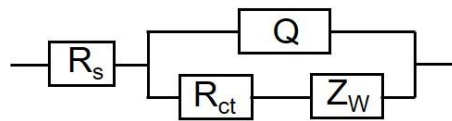

Figure S 6: Equivalent circuit for modeling the electrochemical impedance spectrum acquired from symmetrical cell.  $R_s$ : electrolyte resistance;  $Q$ : constant phase elements;  $R_{ct}$ : charge transfer resistance at Li surface;  $Z_w$ : Warburg impedance

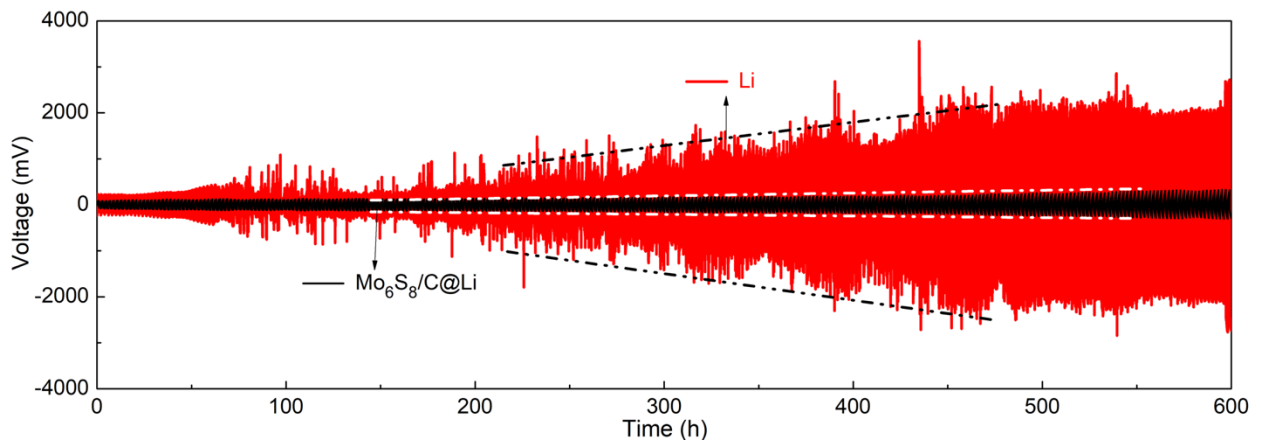

Figure S 7: The  $\text{Mo}_6\text{S}_8/\text{C}$  coated Li metal anode show substantially better cyclic stability compared with pristine Li anodes under symmetric cell configuration (testing at  $1.0 \text{ mA/cm}^2$  and  $1.0 \text{ mAh/cm}^2$  per cycle).

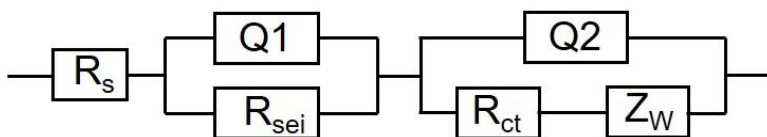

Figure S 8: Equivalent circuit for modeling the electrochemical impedance spectrum acquired from Li metal full cells coupled with NMC-811 cathodes. The parameters  $R_s$ ,  $R_{sei}$  and  $R_{ct}$  represent the electrolyte resistance, solid electrolyte interface (SEI) resistance and the charge transfer resistance, respectively;  $Q1$  and  $Q2$  represent the constant phase elements;  $Z_w$  represents the Warburg impedance.

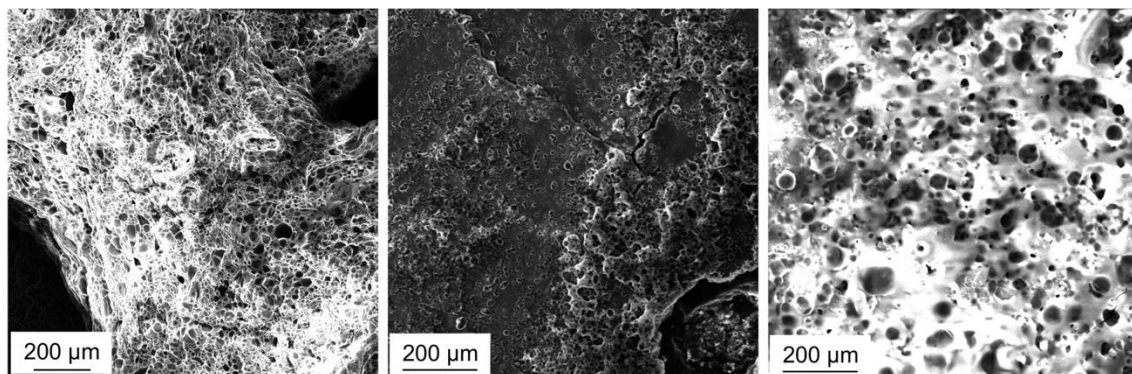

Figure S 9 : Additional post-mortem SEM images acquired from pristine Li metal anode after being cycled for 200 cycles with the NMC-811 cathodes in carbonate electrolyte.

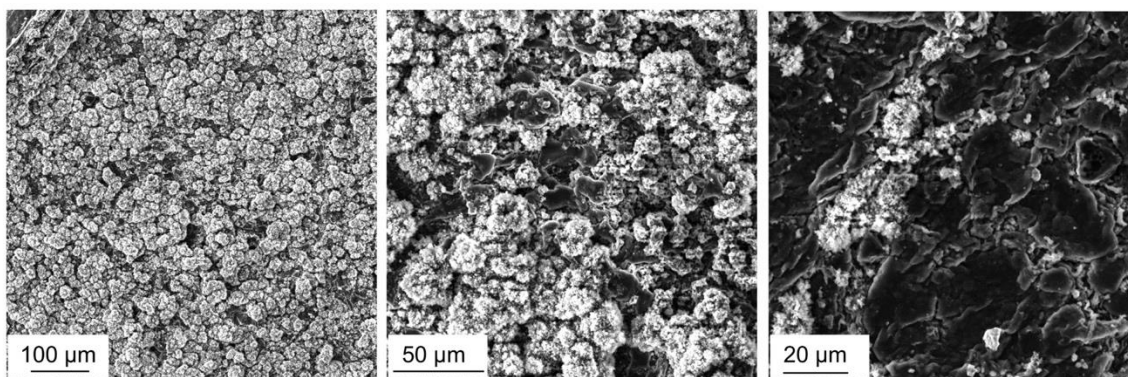

Figure S 6: Additional post-mortem SEM images acquired from hybrid Li metal anode after being cycled for 200 cycles with the NMC-811 cathodes in carbonate electrolyte. The bright agglomerated particles are  $\text{Mo}_6\text{S}_8/\text{C}$  composites and the black colored substrate underneath is Li metal.

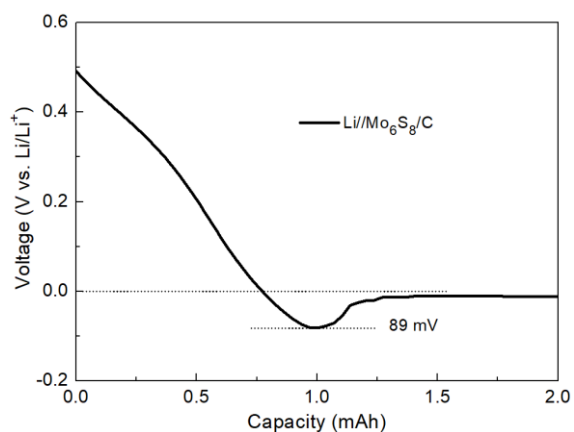

Figure S 11 : Voltage profiles of the initial lithiation process of  $\text{Mo}_6\text{S}_8/\text{C}$  electrode, the current density was  $2 \text{ mA cm}^{-2}$ .



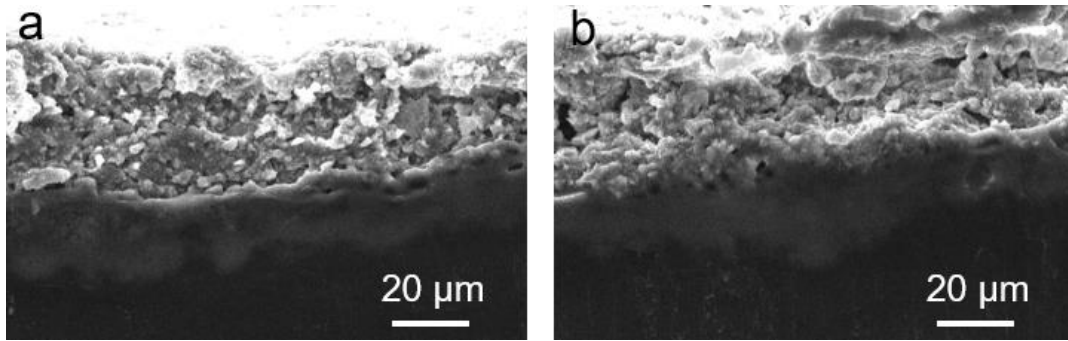

Figure S 7: SEM images of the interphase between Mo<sub>6</sub>S<sub>8</sub>/C layer and Li metal (a) before and (b) after the 200 cycle test.
